# Supplementary material for: Characterization of the late embryogenesis abundant (LEA) proteins family and their role in drought stress tolerance in upland cotton
Source: PubMed Central journal article supplement (PMC5769447; doi:10.1186/s12863-017-0596-1), 2018-01-15
Supplement: 12863_2017_596_MOESM3_ESM.pdf [file 12863_2017_596_MOESM3_ESM.pdf]

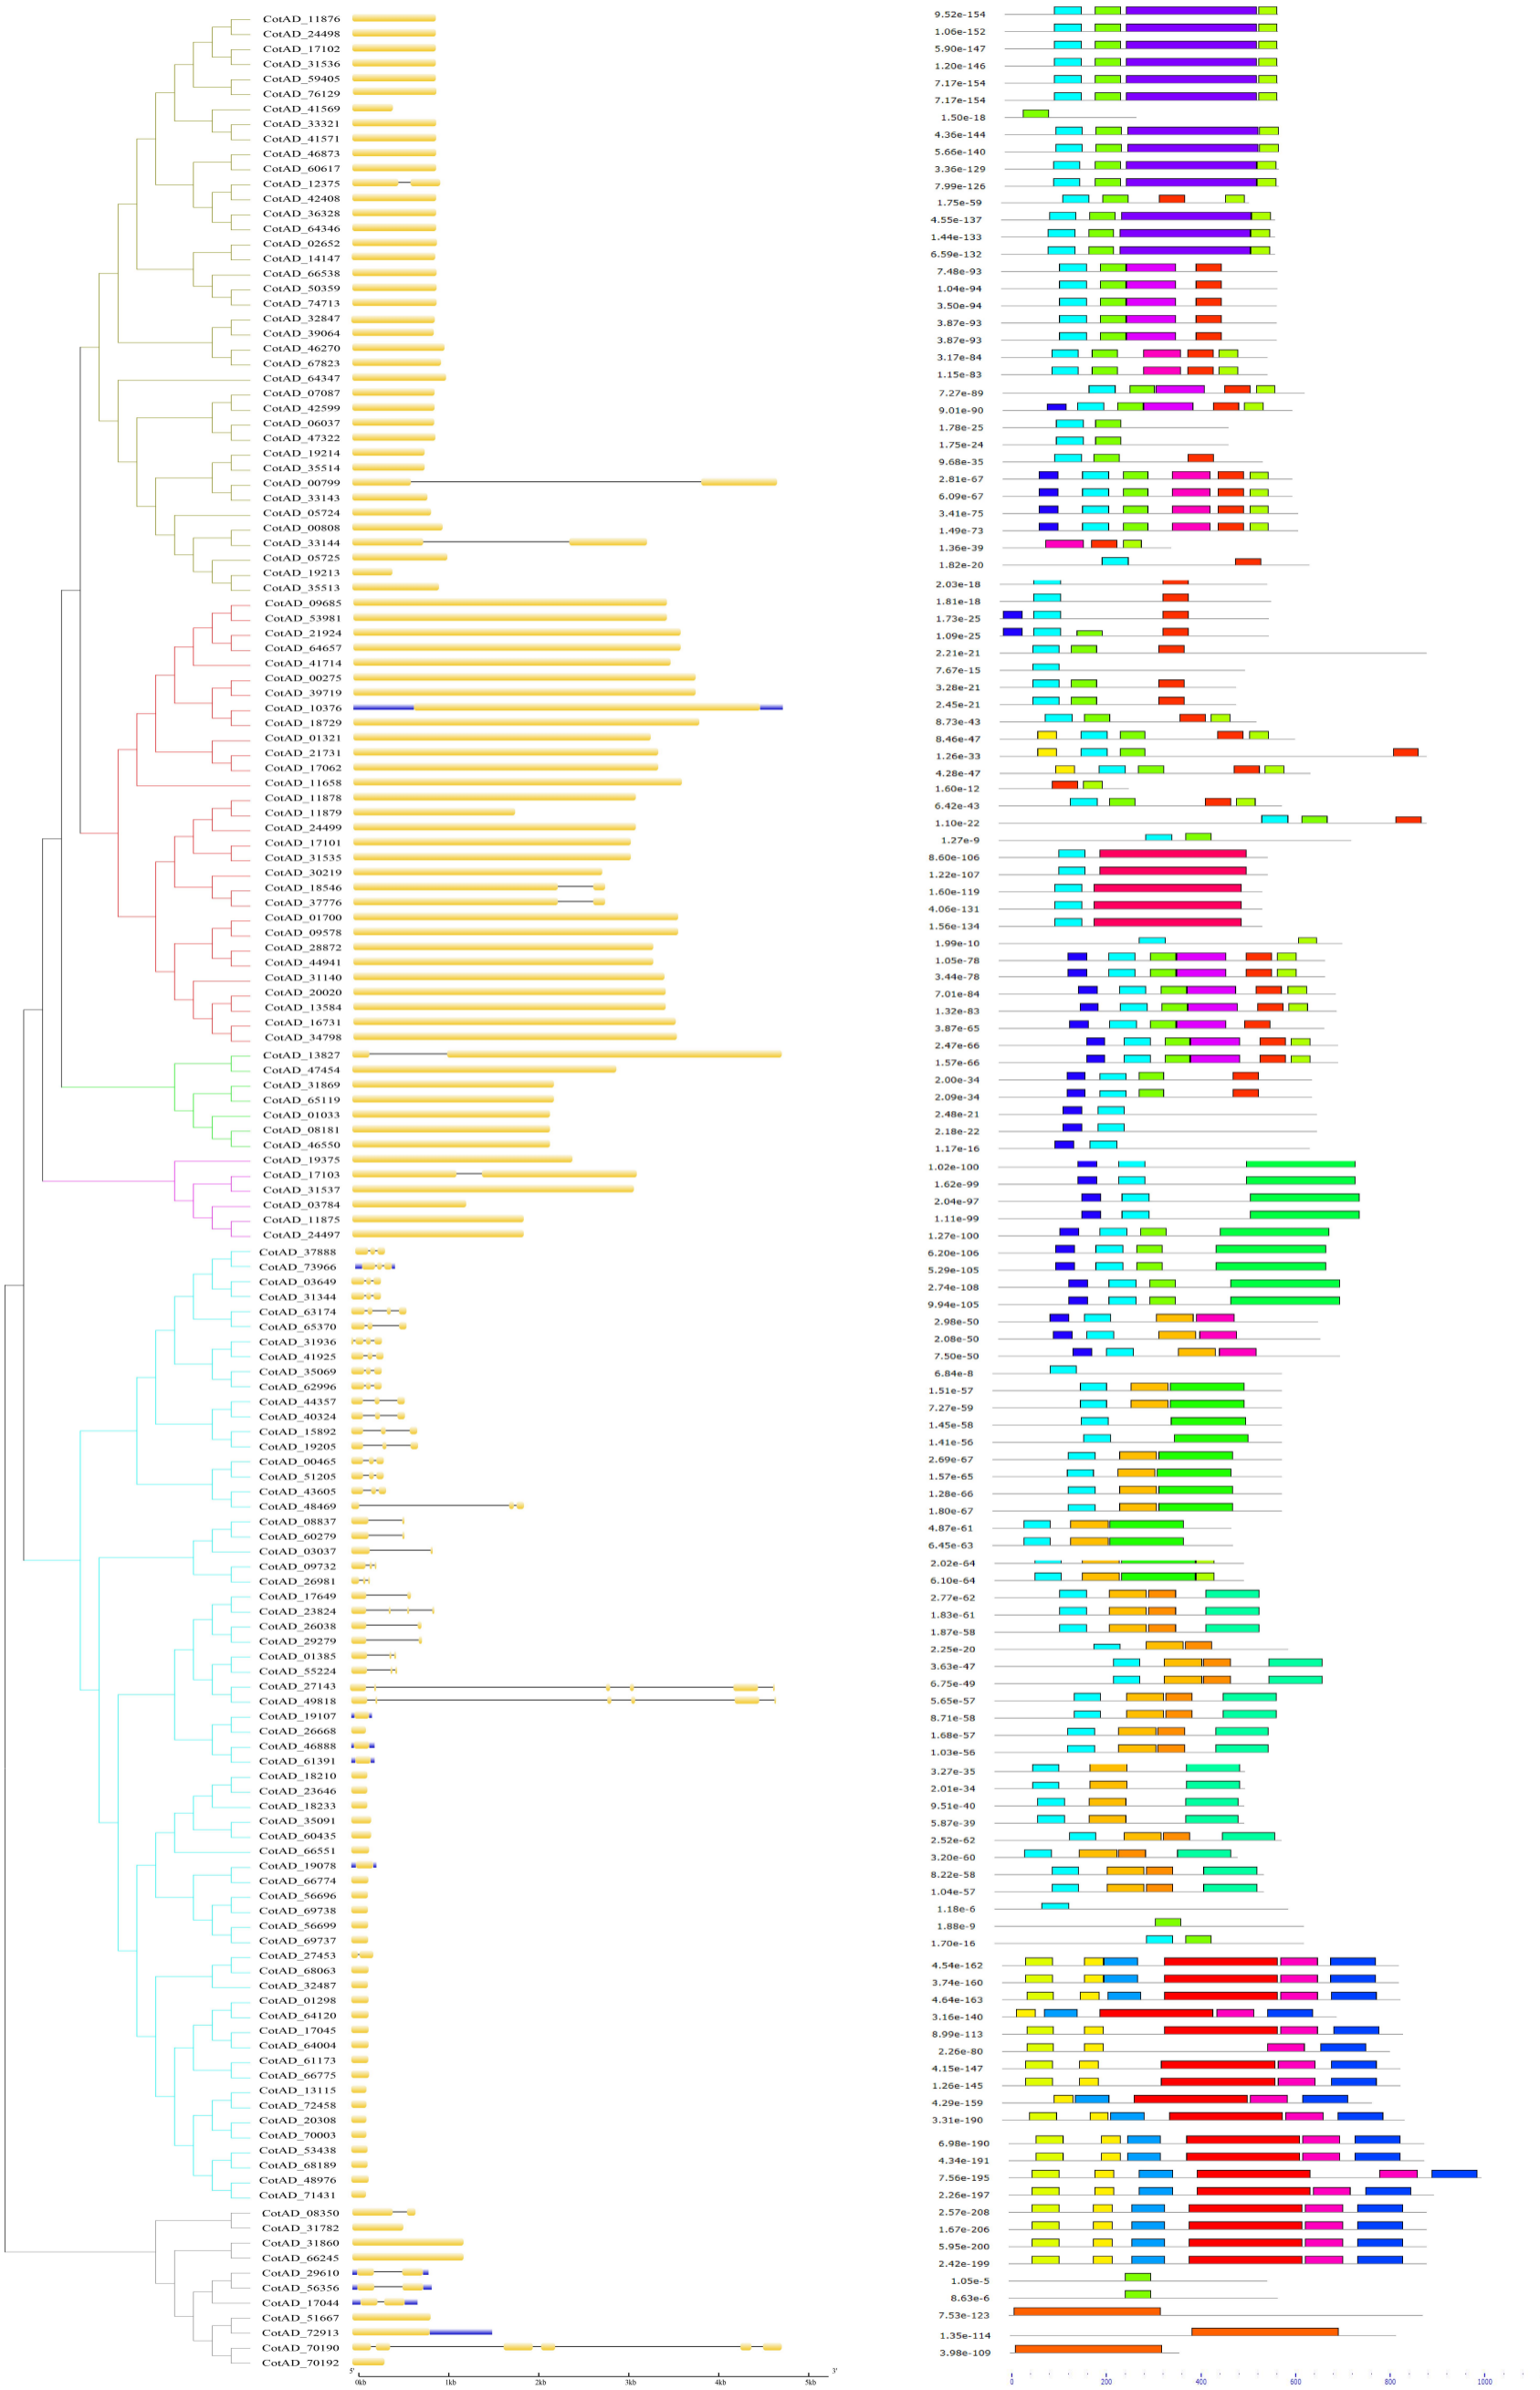

Legend:

- motif 1
- motif 2
- motif 3
- motif 4
- motif 5
- motif 6
- motif 7
- motif 8
- motif 9
- motif 10
- motif 11
- motif 12
- motif 13
- motif 14
- motif 15
- motif 16
- motif 17
- motif 18
- motif 19
- motif 20

■ CDS   
 ■ upstream/downstream   
 — Intron

5'    0    100    200    300    400    500    3'

0    200    400    600    800    1000
